# Supplementary material
Source: ML conference proceedings conference paper supplement (https://openreview.net/forum?id=UpzRoxVbQD)
Supplement: supplementary_material [file neurips_2025_appendix.pdf › neurips_2025_appendix.pdf]

## 769 A Basic Observations

770 In this section, we present several preliminary observations that lay the groundwork for proving our  
 771 main theorems. For clarity and consistency, we fix an instance  $\mathcal{I} = (\mathcal{V}, \mathcal{C}, \mathcal{G}, \pi, \mathbf{d})$  throughout this  
 772 section.

773 **Observation A.1.** *For any deterministic voting rule  $f$  and an ordering  $\sigma$  over  $\mathcal{C}$ , there exists a*  
 774 *candidate with in-degree at least  $\lceil \frac{m-1}{2} \rceil$  in  $\mathcal{T}(f, \mathcal{C}, \sigma)$ .*

775 **Observation A.2.** *Since  $\mathbf{o}_g$  is the optimal candidate in group  $g$ , we have  $\text{cost}_g(\mathbf{o}_g) \leq \text{cost}_g(c)$*   
 776 *for any candidate  $c$ , including  $\mathbf{o}$ . This holds for all objectives (avg-max, avg-avg, max-max and*  
 777 *max-avg).*

778 **Observation A.3.** *Since  $\text{cost}(\cdot)$  is defined as the maximum over  $\text{cost}_g(\cdot)$  under the max-avg and*  
 779 *max-max objectives, it follows that  $\text{cost}_g(\mathbf{o}) \leq \text{cost}(\mathbf{o})$ , for each group  $g$ .*

780 **Observation A.4.** *For rand-det mechanism  $\Psi = (\mathbf{f}_{in}, \mathbf{f}_{ur})$  with output  $\mathbf{w}$ , the expected cost of the*  
 781 *mechanism is given by*

$$\mathbb{E}[\text{cost}(\mathbf{w})] = \frac{1}{k} \sum_{g \in \mathcal{G}} \text{cost}(\mathbf{w}_g).$$

782 **Observation A.5.** *For rand-rand mechanism  $\Psi = (\mathbf{f}_{rd}, \mathbf{f}_{ur})$  with output  $\mathbf{w}$ , the expected cost of the*  
 783 *mechanism is given by*

$$\mathbb{E}[\text{cost}(\mathbf{w})] = \frac{1}{k} \sum_{g \in \mathcal{G}} \frac{1}{n_g} \sum_{v \in g} \text{cost}(\text{top}(v)).$$

784 *Proof.* By the definitions of the Random Dictatorship rule ( $\mathbf{f}_{rd}$ ) and the uniform selection rule ( $\mathbf{f}_{ur}$ ),  
 785 we have

$$\begin{aligned} \mathbb{E}[\text{cost}(\mathbf{w})] &= \sum_{g \in \mathcal{G}} \Pr(\mathbf{w} = \mathbf{w}_g) \cdot \mathbb{E}[\text{cost}(\mathbf{w}_g)] \\ &= \frac{1}{k} \sum_{g \in \mathcal{G}} \mathbb{E}[\text{cost}(\mathbf{w}_g)] \\ &= \frac{1}{k} \sum_{g \in \mathcal{G}} \sum_{v \in g} \Pr(\mathbf{w}_g = \text{top}(v)) \cdot \text{cost}(\text{top}(v)) \\ &= \frac{1}{k} \sum_{g \in \mathcal{G}} \frac{1}{n_g} \sum_{v \in g} \text{cost}(\text{top}(v)). \end{aligned}$$

786

□

787 **Observation A.6.** *For the max-avg objective and any group  $g$ , we have  $\text{cost}_g(\mathbf{o}) \leq \text{cost}(\mathbf{o})$ , as*  
 788 *implied directly by the definition of max-avg.*

789 **Observation A.7.** *Since  $\text{top}(v)$  denotes the candidate closest to voter  $v$ , it follows that  $d(v, \text{top}(v)) \leq$*   
 790  *$d(v, c)$  for any candidate  $c$ .*

791 **Observation A.8.** *For every voter  $v$  and every candidate  $c$ , we have  $d(v, c) \leq d(v^{**}(c), c)$ .*

792 **Observation A.9.** *For every group  $g$ , every voter  $v \in g$ , and every candidate  $c$ , we have  $d(v, c) \leq$*   
 793  *$d(v^*(c, g), c)$ .*

794 **Observation A.10.** *Consider a distributed mechanism  $\Psi = (\mathbf{f}_{in}, \mathbf{f}_{ov})$ , where  $\mathbf{f}_{in}$  is a deterministic*  
 795 *rule with distortion at most  $\alpha$ . By the definition of centralized distortion, we know that:*

$$\text{cost}_g(\mathbf{w}_g) \leq \alpha \cdot \text{cost}_g(\mathbf{o}_g), \quad \forall g \in \mathcal{G}.$$

796 **Observation A.11.** *Consider a det-det mechanism  $\Psi = (\mathbf{f}_{in}, \mathbf{f}_{ov})$ , where  $\mathbf{f}_{ov}$  has distortion at most*  
 797  *$\beta$  with respect to avg objective. By the definition of centralized distortion, we know that:*

$$\frac{1}{k} \sum_{g \in \mathcal{G}} d(\mathbf{w}, \mathbf{w}_g) \leq \beta \cdot \frac{1}{k} \sum_{g \in \mathcal{G}} d(\mathbf{o}, \mathbf{w}_g), \quad \forall g \in \mathcal{G}.$$

798 **B Proofs for Section 3 (Distortion Bounds of rand-det)**

799 **Theorem 3.1.** *Let  $f_\alpha$  be a deterministic voting rule with distortion at most  $\alpha$ . Then, for the max-avg*  
800 *objective in general metric spaces,  $D((f_\alpha, f_{ur})) \leq \alpha + 2$ .*

801 *Proof.* Consider an instance  $\mathcal{I} = (\mathcal{V}, \mathcal{C}, \mathcal{G}, \pi, d)$  and rand-det mechanism  $\Psi = (f_\alpha, f_{ur})$ . Now, we  
802 obtain

$$\begin{aligned}
\mathbb{E}[\text{cost}(\mathbf{w})] &= \sum_{g \in \mathcal{G}} \frac{1}{k} \cdot \text{cost}(\mathbf{w}_g) && \text{(Observation A.4)} \\
&= \sum_{g \in \mathcal{G}} \frac{1}{k} \cdot \frac{1}{n_{g^*}(\mathbf{w}_g)} \sum_{v \in g^*(\mathbf{w}_g)} d(v, \mathbf{w}_g) && \text{(Definition of max-avg)} \\
&\leq \sum_{g \in \mathcal{G}} \frac{1}{k} \cdot \frac{1}{n_{g^*}(\mathbf{w}_g)} \sum_{v \in g^*(\mathbf{w}_g)} \left( d(v, \mathbf{o}) + d(\mathbf{o}, \mathbf{w}_g) \right) && \text{(Triangle Inequality)} \\
&= \sum_{g \in \mathcal{G}} \frac{1}{k} \cdot \frac{1}{n_{g^*}(\mathbf{w}_g)} \sum_{v \in g^*(\mathbf{w}_g)} d(v, \mathbf{o}) \\
&\quad + \sum_{g \in \mathcal{G}} \frac{1}{k} \cdot \frac{1}{n_{g^*}(\mathbf{w}_g)} \sum_{v \in g^*(\mathbf{w}_g)} d(\mathbf{o}, \mathbf{w}_g) \\
&\leq \sum_{g \in \mathcal{G}} \frac{1}{k} \cdot \text{cost}(\mathbf{o}) + \sum_{g \in \mathcal{G}} \frac{1}{k} \cdot \frac{1}{n_{g^*}(\mathbf{w}_g)} \sum_{v \in g^*(\mathbf{w}_g)} d(\mathbf{o}, \mathbf{w}_g) && \text{(Observation A.3)} \\
&= \sum_{g \in \mathcal{G}} \frac{1}{k} \cdot \text{cost}(\mathbf{o}) + \sum_{g \in \mathcal{G}} \frac{1}{k} \cdot d(\mathbf{o}, \mathbf{w}_g) \\
&\leq \text{cost}(\mathbf{o}) + \sum_{g \in \mathcal{G}} \frac{1}{k} \cdot \frac{1}{n_g} \sum_{v \in g} \left( d(v, \mathbf{o}) + d(v, \mathbf{w}_g) \right) && \text{(Triangle Inequality)} \\
&= \text{cost}(\mathbf{o}) + \sum_{g \in \mathcal{G}} \frac{1}{k} \cdot \frac{1}{n_g} \sum_{v \in g} d(v, \mathbf{o}) \\
&\quad + \sum_{g \in \mathcal{G}} \frac{1}{k} \cdot \frac{1}{n_g} \sum_{v \in g} d(v, \mathbf{w}_g) \\
&\leq \text{cost}(\mathbf{o}) + \sum_{g \in \mathcal{G}} \frac{1}{k} \cdot \text{cost}(\mathbf{o}) + \sum_{g \in \mathcal{G}} \frac{1}{k} \cdot \text{cost}_g(\mathbf{w}_g) \\
&= 2\text{cost}(\mathbf{o}) + \sum_{g \in \mathcal{G}} \frac{1}{k} \cdot \text{cost}_g(\mathbf{w}_g) \\
&\leq 2\text{cost}(\mathbf{o}) + \sum_{g \in \mathcal{G}} \frac{1}{k} \cdot \alpha \cdot \text{cost}_g(\mathbf{o}_g) && \text{(Observation A.10)} \\
&\leq 2\text{cost}(\mathbf{o}) + \alpha \sum_{g \in \mathcal{G}} \frac{1}{k} \cdot \text{cost}_g(\mathbf{o}) && \text{(Observation A.2)} \\
&\leq 2\text{cost}(\mathbf{o}) + \alpha \sum_{g \in \mathcal{G}} \frac{1}{k} \cdot \text{cost}(\mathbf{o}) && \text{(Observation A.3)} \\
&= (\alpha + 2)\text{cost}(\mathbf{o}).
\end{aligned}$$

803

□

804 **Theorem 3.2.** *Let  $f_\alpha$  be a deterministic voting rule with distortion at most  $\alpha$ . Then, for the avg-avg*  
805 *objective in general metric spaces,  $D((f_\alpha, f_{ur})) \leq \alpha + 2 - \frac{2}{k}$ .*

806 *Proof.* Consider an instance  $\mathcal{I} = (\mathcal{V}, \mathcal{C}, \mathcal{G}, \pi, \mathbf{d})$  and rand-det mechanism  $\Psi = (f_\alpha, f_{ur})$ . Now, we  
 807 obtain

$$\begin{aligned}
\mathbb{E}[\text{cost}(\mathbf{w})] &= \sum_{g \in \mathcal{G}} \frac{1}{k} \cdot \text{cost}(\mathbf{w}_g) && \text{(Observation A.4)} \\
&= \frac{1}{k} \sum_{g \in \mathcal{G}} \frac{1}{k} \sum_{g' \in \mathcal{G}} \text{cost}_{g'}(\mathbf{w}_g) \\
&= \frac{1}{k} \sum_{g \in \mathcal{G}} \frac{1}{k} \sum_{g' \in \mathcal{G}} \frac{1}{n_{g'}} \sum_{v \in g'} \mathbf{d}(v, \mathbf{w}_g) && \text{(Definition of avg-avg)} \\
&\leq \frac{1}{k} \sum_{g \in \mathcal{G}} \frac{1}{k} \sum_{g' \in \mathcal{G}, g \neq g'} \frac{1}{n_{g'}} \sum_{v \in g'} \left( \mathbf{d}(v, \mathbf{o}) + \mathbf{d}(\mathbf{o}, \mathbf{w}_g) \right) \\
&+ \frac{1}{k} \sum_{g \in \mathcal{G}} \frac{1}{k} \sum_{g' \in \mathcal{G}, g = g'} \frac{1}{n_{g'}} \sum_{v \in g'} \mathbf{d}(v, \mathbf{w}_g) && \text{(Triangle Inequality)} \\
&= \frac{1}{k} \sum_{g \in \mathcal{G}} \frac{1}{k} \sum_{g' \in \mathcal{G}, g \neq g'} \frac{1}{n_{g'}} \sum_{v \in g'} \left( \mathbf{d}(v, \mathbf{o}) + \mathbf{d}(\mathbf{o}, \mathbf{w}_g) \right) \\
&+ \frac{1}{k} \sum_{g \in \mathcal{G}} \frac{1}{k} \cdot \text{cost}_g(\mathbf{w}_g) \\
&\leq \frac{1}{k} \sum_{g \in \mathcal{G}} \frac{1}{k} \sum_{g' \in \mathcal{G}, g \neq g'} \frac{1}{n_{g'}} \sum_{v \in g'} \left( \mathbf{d}(v, \mathbf{o}) + \mathbf{d}(\mathbf{o}, \mathbf{w}_g) \right) \\
&+ \frac{1}{k} \sum_{g \in \mathcal{G}} \frac{1}{k} \cdot \alpha \cdot \text{cost}_g(\mathbf{o}_g) && \text{(Observation A.10)} \\
&\leq \frac{1}{k} \sum_{g \in \mathcal{G}} \frac{1}{k} \sum_{g' \in \mathcal{G}, g \neq g'} \frac{1}{n_{g'}} \sum_{v \in g'} \left( \mathbf{d}(v, \mathbf{o}) + \mathbf{d}(\mathbf{o}, \mathbf{w}_g) \right) \\
&+ \frac{1}{k} \sum_{g \in \mathcal{G}} \frac{1}{k} \cdot \alpha \cdot \text{cost}_g(\mathbf{o}) && \text{(Observation A.2)} \\
&= \frac{1}{k} \sum_{g \in \mathcal{G}} \frac{1}{k} \sum_{g' \in \mathcal{G}, g \neq g'} \frac{1}{n_{g'}} \sum_{v \in g'} \left( \mathbf{d}(v, \mathbf{o}) + \mathbf{d}(\mathbf{o}, \mathbf{w}_g) \right) \\
&+ \frac{\alpha}{k} \cdot \text{cost}(\mathbf{o}) && (\text{cost}(\mathbf{o}) = \sum_{g \in \mathcal{G}} \frac{1}{k} \text{cost}_g(\mathbf{o})) \\
&= \frac{1}{k} \sum_{g \in \mathcal{G}} \frac{1}{k} \sum_{g' \in \mathcal{G}, g \neq g'} \frac{1}{n_{g'}} \sum_{v \in g'} \mathbf{d}(v, \mathbf{o}) \\
&+ \frac{1}{k} \sum_{g \in \mathcal{G}} \frac{1}{k} \sum_{g' \in \mathcal{G}, g \neq g'} \frac{1}{n_{g'}} \sum_{v \in g'} \mathbf{d}(\mathbf{o}, \mathbf{w}_g) + \frac{\alpha}{k} \cdot \text{cost}(\mathbf{o}) \\
&= \frac{1}{k} \sum_{g \in \mathcal{G}} \frac{1}{k} \sum_{g' \in \mathcal{G}, g \neq g'} \frac{1}{n_{g'}} \sum_{v \in g'} \mathbf{d}(v, \mathbf{o}) \\
&+ \frac{1}{k} \sum_{g \in \mathcal{G}} \frac{k-1}{k} \cdot \mathbf{d}(\mathbf{o}, \mathbf{w}_g) + \frac{\alpha}{k} \cdot \text{cost}(\mathbf{o}) \\
&\leq \frac{1}{k} \sum_{g \in \mathcal{G}} \frac{1}{k} \sum_{g' \in \mathcal{G}, g \neq g'} \frac{1}{n_{g'}} \sum_{v \in g'} \mathbf{d}(v, \mathbf{o}) \\
&+ \frac{1}{k} \sum_{g \in \mathcal{G}} \frac{k-1}{k} \cdot \frac{1}{n_g} \sum_{v \in g} (\mathbf{d}(v, \mathbf{o}) + \mathbf{d}(v, \mathbf{w}_g)) + \frac{\alpha}{k} \cdot \text{cost}(\mathbf{o}) && \text{(Triangle Inequality)}
\end{aligned}$$

$$\begin{aligned}
&= \frac{1}{k} \sum_{g \in \mathcal{G}} \frac{1}{k} \sum_{g' \in \mathcal{G}, g' \neq g} \frac{1}{n_{g'}} \sum_{v \in g'} d(v, o) \\
&+ \frac{1}{k} \sum_{g \in \mathcal{G}} \frac{k-1}{k} \cdot (\text{cost}_g(o) + \text{cost}_g(w_g)) + \frac{\alpha}{k} \cdot \text{cost}(o) \quad (\text{Definition of } \text{cost}_g(.)) \\
&\leq \frac{1}{k} \sum_{g \in \mathcal{G}} \frac{1}{k} \sum_{g' \in \mathcal{G}, g' \neq g} \frac{1}{n_{g'}} \sum_{v \in g'} d(v, o) \\
&+ \frac{1}{k} \sum_{g \in \mathcal{G}} \frac{k-1}{k} \cdot (\text{cost}_g(o) + \alpha \cdot \text{cost}_g(o_g)) + \frac{\alpha}{k} \cdot \text{cost}(o) \quad (\text{Observation A.10}) \\
&\leq \frac{1}{k} \sum_{g \in \mathcal{G}} \frac{1}{k} \sum_{g' \in \mathcal{G}, g' \neq g} \frac{1}{n_{g'}} \sum_{v \in g'} d(v, o) \\
&+ \frac{1}{k} \sum_{g \in \mathcal{G}} \frac{k-1}{k} \cdot (\text{cost}_g(o) + \alpha \cdot \text{cost}_g(o)) + \frac{\alpha}{k} \cdot \text{cost}(o) \quad (\text{Observation A.2}) \\
&= \frac{1}{k} \sum_{g \in \mathcal{G}} \frac{1}{k} \sum_{g' \in \mathcal{G}, g' \neq g} \frac{1}{n_{g'}} \sum_{v \in g'} d(v, o) \\
&+ \frac{(k-1)(\alpha+1)}{k} \cdot \text{cost}(o) + \frac{\alpha}{k} \cdot \text{cost}(o) \quad (\text{Definition of avg-avg}) \\
&= \frac{1}{k} \sum_{g \in \mathcal{G}} \frac{1}{k} \sum_{g' \in \mathcal{G}, g' \neq g} \text{cost}_{g'}(o) + \frac{\alpha k + k - 1}{k} \cdot \text{cost}(o) \\
&= \frac{1}{k} \sum_{g \in \mathcal{G}} \frac{1}{k} \sum_{g' \in \mathcal{G}} \text{cost}_{g'}(o) - \frac{1}{k} \sum_{g \in \mathcal{G}} \frac{1}{k} \sum_{g' \in \mathcal{G}, g=g'} \text{cost}_{g'}(o) \\
&+ \frac{\alpha k + k - 1}{k} \cdot \text{cost}(o) \\
&= \text{cost}(o) - \frac{1}{k} \sum_{g \in \mathcal{G}} \frac{1}{k} \cdot \text{cost}_g(o) + \frac{\alpha k + k - 1}{k} \cdot \text{cost}(o) \\
&= \text{cost}(o) - \frac{1}{k} \cdot \text{cost}(o) + \frac{\alpha k + k - 1}{k} \cdot \text{cost}(o) \\
&= (\alpha + 2 - \frac{2}{k}) \cdot \text{cost}(o).
\end{aligned}$$

□

**Theorem 3.3.** Let  $f_{un}$  be a deterministic voting rule that satisfies the unanimity property. Then, for the avg-max and max-max objectives in general metric spaces,  $D((f_{un}, f_{ur})) \leq 3$ .

*Proof.* Here, we present a proof only for the avg-max objective; the proof for max-max is similar. Consider an instance  $\mathcal{I} = (\mathcal{V}, \mathcal{C}, \mathcal{G}, \pi, d)$  and rand-det mechanism  $\Psi = (f_{un}, f_{ur})$ . By the unanimity property, for each group  $g$ , there exists a voter  $v_g \in g$  who prefers  $w_g$  to  $o$ . Therefore, we have:

$$\begin{aligned}
\mathbb{E}[\text{cost}(w)] &= \sum_{g \in \mathcal{G}} \frac{1}{k} \cdot \text{cost}(w_g) \quad (\text{Observation A.4}) \\
&= \sum_{g \in \mathcal{G}} \frac{1}{k} \cdot \frac{1}{k} \sum_{g' \in \mathcal{G}} d(v^*(w_g, g'), w_g) \quad (\text{Definition of avg-max}) \\
&\leq \sum_{g \in \mathcal{G}} \frac{1}{k} \cdot \frac{1}{k} \sum_{g' \in \mathcal{G}} \left( d(v^*(w_g, g'), o) + d(o, w_g) \right) \quad (\text{Triangle Inequality}) \\
&\leq \sum_{g \in \mathcal{G}} \frac{1}{k} \cdot \frac{1}{k} \sum_{g' \in \mathcal{G}} \left( d(v^*(o, g'), o) + d(o, w_g) \right) \quad (\text{Observation A.9})
\end{aligned}$$

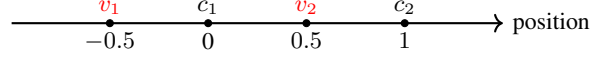

Figure 1: An example used in the proof of Theorem 3.4.

$$\begin{aligned}
&= \text{cost}(\mathbf{o}) + \sum_{g \in \mathcal{G}} \frac{1}{k} \cdot d(\mathbf{o}, \mathbf{w}_g) \\
&\leq \text{cost}(\mathbf{o}) + \frac{1}{k} \sum_{g \in \mathcal{G}} \left( d(\mathbf{o}, v_g) + d(v_g, \mathbf{w}_g) \right) && \text{(Triangle Inequality)} \\
&\leq \text{cost}(\mathbf{o}) + \frac{2}{k} \sum_{g \in \mathcal{G}} d(v_g, \mathbf{o}) && (d(v_g, \mathbf{w}_g) \leq d(v_g, \mathbf{o})) \\
&\leq \text{cost}(\mathbf{o}) + \frac{2}{k} \sum_{g \in \mathcal{G}} d(v^*(\mathbf{o}, g), \mathbf{o}) && \text{(Observation A.9)} \\
&= 3\text{cost}(\mathbf{o}).
\end{aligned}$$

816

□

817 **Theorem 3.4.** *In general metric spaces, any rand-det mechanism has distortion of at least 3 for the*  
818 *avg-max and max-max objectives, even when the metric space is a line.*

819 *Proof.* We provide a proof for the avg-max objective. A similar argument can be used to prove the  
820 result for the max-max objective as well.

Consider a rand-det mechanism  $\Psi = (f_{in}, f_{ov})$ . We construct an instance with candidates  $\mathcal{C} = \{c_1, c_2\}$  and voters  $\mathcal{V} = \{v_1, v_2\}$  in a single group.  $c_1$  and  $c_2$  are located at positions 0 and 1, respectively.  $v_1$  and  $v_2$  with preference profiles  $\pi_1 = (c_1, c_2)$  and  $\pi_2 = (c_2, c_1)$ , are also positioned at  $-\frac{1}{2}$  and  $\frac{1}{2}$ , respectively. Without loss of generality, assume that  $\Psi$  selects  $c_2$  as the representative of the group, and thus the final winner is  $c_2$ . Refer to Figure 1 for a visual illustration. By the definition of the avg-max objective, and since there is only one group, we have  $\text{cost}(c_1) = \frac{1}{2}$  and  $\text{cost}(c_2) = \frac{3}{2}$ . Therefore, the distortion of  $\Psi$  is

$$D(\Psi) \geq \frac{\text{cost}(c_2)}{\text{cost}(c_1)} = 3.$$

821

□

822 **Theorem 3.5.** *Any rand-det mechanism has a metric distortion of at least 5 for max-avg, even when*  
823 *the metric is a line.*

824 *Proof.* Consider a rand-det mechanism  $\Psi = (f_{in}, f_{ov})$ . We construct an instance with candidates  
825  $\mathcal{C} = \{c_1, c_2, c_3, c_4\}$ , and voters  $\mathcal{V} = \{v_1, v_2, v_3, v_4\}$ , split into two groups  $g_1 = \{v_1, v_2\}$  and  
826  $g_2 = \{v_3, v_4\}$ , all within a line metric.

827 Let  $\sigma$  be an arbitrary ordering of the candidates. Without loss of generality suppose  $c_1$  is a candidate  
828 with in-degree at least  $\lceil \frac{m-1}{2} \rceil = 2$  in  $\mathcal{T}(f_{in}, \mathcal{C}, \sigma)$ . By Observation A.1, we know such a candidate  
829 always exists. Without loss of generality, suppose  $c_2$  and  $c_3$  are two candidates that have a directed  
830 edge toward  $c_1$  in  $\mathcal{T}(f_{in}, \mathcal{C}, \sigma)$ . Again, without loss of generality, assume  $c_2 \succ_\sigma c_3$ . Now, consider  
831 the following construction on the line metric:

- 832 •  $c_2, c_1$ , and  $c_3$  are located at  $-1, 0$ , and  $1$ , respectively.
- 833 •  $v_2$  and  $v_3$  are located at  $0$ ,  $v_1$  and  $v_4$  are located at  $-0.5$  and  $0.5$ , respectively.
- 834 •  $c_4$  is also positioned based on  $\sigma$ , ensuring that the input to  $\mathcal{T}(f_{in}, \mathcal{C}, \sigma)$  remains valid. We  
835 consider three cases:
  - 836 – case 1: If  $c_2 \succ_\sigma c_3 \succ_\sigma c_4$ ,  $c_4$  is located at  $10$ .

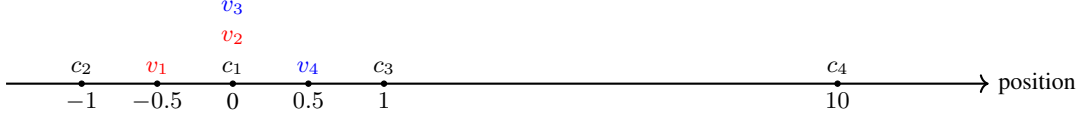

Figure 2: An example used in case 1 of Theorem 3.5. Different groups are represented using different colors.

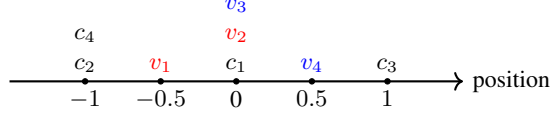

Figure 3: An example used in case 2 of Theorem 3.5. Different groups are represented using different colors.

- 837           – case 2: If  $c_2 \succ_\sigma c_4 \succ_\sigma c_3$ ,  $c_4$  is located at  $-1$ .
- 838           – case 3: If  $c_4 \succ_\sigma c_2 \succ_\sigma c_3$ ,  $c_4$  is located at  $1$ . Refer to Figures 2 to 4.

839 Note that when two candidates are equidistant from a voter, multiple preference profiles can be  
840 consistent with the underlying metric space. By the definition of the Bias tournament, we know that

- 841           • A directed edge exists from  $c_2$  to  $c_1$ . Thus,  $c_2$  is selected as the representative of  $g_1$ .
- 842           • Likewise, there exists a directed edge from  $c_3$  to  $c_1$ , making  $c_3$  the representative of  $g_2$ .

843 Clearly,  $c_1$  is the optimal candidate in all cases. By the definition of the max-avg objective, we have  
844  $\text{cost}(c_2) = \text{cost}(c_3) = \frac{5}{4}$  and  $\text{cost}(c_1) = \frac{1}{4}$ . The mechanism must now select the final winner from  
845 the group representatives,  $c_2$  or  $c_3$ . We calculate the distortion of  $\Psi$  as follows:

$$\begin{aligned} D(\Psi) &\geq \min \left( \frac{\text{cost}(c_2)}{\text{cost}(o)}, \frac{\text{cost}(c_3)}{\text{cost}(o)} \right) \\ &\geq \frac{\text{cost}(c_2)}{\text{cost}(c_1)} \\ &= 5. \end{aligned}$$

846 □

847 **Theorem 3.6.** Any rand-det mechanism has a metric distortion of at least  $5 - \frac{2}{k}$  for avg-avg.

848 *Proof.* Consider a rand-det mechanism  $\Psi = (f_{in}, f_{ov})$ . We construct an instance with candidates  
849  $\mathcal{C} = \{c_1, c_2, \dots, c_{m=2k}\}$ , voters  $\mathcal{V} = \{v_1, v_2, \dots, v_{n=2k}\}$ , and  $k$  groups  $g_i = \{v_{2i-1}, v_{2i}\}$  for  
850  $1 \leq i \leq k$ . Let  $\sigma$  be an arbitrary ordering of the candidates. Without loss of generality, suppose  
851 that  $c_{2k}$  is a candidate with in-degree at least  $\lceil \frac{m-1}{2} \rceil = k$  in  $\mathcal{T}(f_{in}, \mathcal{C}, \sigma)$ . Again, without loss  
852 of generality, assume that  $c_1, c_2, \dots, c_k$  are  $k$  candidates that have directed edges toward  $c_{2k}$  in  
853  $\mathcal{T}(f_{in}, \mathcal{C}, \sigma)$ .

854 We construct a connected graph  $G$  with  $2k + 3$  vertices  $u_1, u_2, \dots, u_{2k+3}$  and use the shortest-path  
855 distances in  $G$  as the underlying metric  $d$ . Each voter and candidate is placed on one of the vertices  
856 (a vertex may host multiple entities). The construction of  $G$  is as follows:

- 857           • Place candidate  $c_{2k}$  at vertex  $u_1$ .
- 858           • For each  $1 \leq i \leq k + 1$ , add an edge between  $u_1$  and  $u_{2i}$ , and another edge between  $u_{2i}$   
859           and  $u_{2i+1}$ . This creates  $k + 1$  branches extending from the central vertex  $u_1$ .
- 860           • For each  $1 \leq i \leq k$ , place voter  $v_{2i-1}$  at vertex  $u_1$ , voter  $v_{2i}$  at vertex  $u_{2i}$ , and candidate  $c_i$   
861           at vertex  $u_{2i+1}$ .

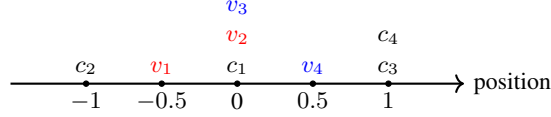

Figure 4: An example used in case 3 of Theorem 3.5. Different groups are represented using different colors.

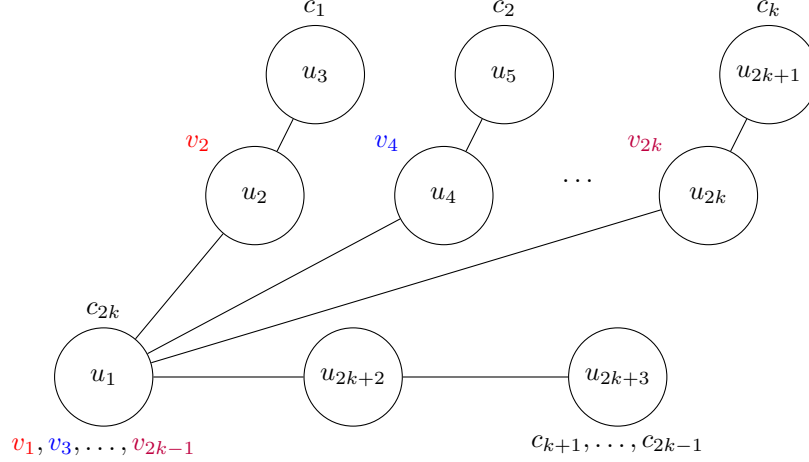

Figure 5: The graph  $G$  used in Theorem 3.6. Different groups are represented using different colors.

- For each  $k + 1 \leq i \leq 2k - 1$ , place candidate  $c_i$  at vertex  $u_{2k+3}$ .

Refer to Figure 5 for an illustration of the construction.

Pairwise distances between candidates and voters are presented in Table 2 and Table 3. One can verify that the preference profiles defined in Table 6 are consistent with the metric space  $\mathbf{d}$  derived from distances in  $G$ . Note that there are multiple preference profiles consistent with  $\mathbf{d}$ .

By the definition of the Bias tournament, we conclude that the representative of  $g_i$  is  $c_i$  for all  $1 \leq i \leq k$ , thus, one of these representatives is the final winner. Our analysis shows that  $\text{cost}(c_{2k}) = \frac{1}{2}$ , and  $\text{cost}(c_i) = \frac{5 - \frac{2}{k}}{2}$ , for all  $1 \leq i \leq k$ . We can now derive the distortion of mechanism  $\Psi$ :

$$\begin{aligned} D(\Psi) &\geq \frac{\min_{1 \leq i \leq k} (\text{cost}(c_i))}{\text{cost}(o)} \\ &\geq \frac{\frac{5 - \frac{2}{k}}{2}}{\text{cost}(c_{2k})} \\ &= 5 - \frac{2}{k}. \end{aligned}$$

□

## C Proofs for Section 4 (Distortion Bounds of rand-rand)

**Theorem 4.1.** For the max-max objective in general metric spaces,  $D((f_{rd}, f_{ur})) \leq 3$ .

| $d(\cdot, \cdot)$ | $c_{2k}$ | $c_i$ |
|-------------------|----------|-------|
| $v_{2i-1}$        | 0        | 2     |
| $v_{2i}$          | 1        | 1     |
| $v_{2j-1}$        | 0        | 2     |
| $v_{2j}$          | 1        | 3     |

Table 2: For any  $1 \leq i, j \leq k$  with  $i \neq j$ , the pairwise distances between the candidates  $c_1, c_2, \dots, c_k$  and the voters are as shown in Theorem 3.6.

| $d(\cdot, \cdot)$ | $c_i$ |
|-------------------|-------|
| $v_{2j-1}$        | 2     |
| $v_{2j}$          | 3     |

Table 3: For any  $k+1 \leq i \leq 2k-1$  and  $1 \leq j \leq k$ , the pairwise distances between the candidates  $c_{k+1}, c_{k+2}, \dots, c_{2k-1}$  and the voters are as shown in Theorem 3.6.

873 *Proof.* Consider an instance  $\mathcal{I} = (\mathcal{V}, \mathcal{C}, \mathcal{G}, \pi, \mathbf{d})$  and rand-rand mechanism  $\Psi = (f_{rd}, f_{ur})$ . For any  
874 voter  $v \in \mathcal{V}$ , we have

$$\begin{aligned}
\text{cost}(\text{top}(v)) &= d(v^{**}(\text{top}(v)), \text{top}(v)) && \text{(Definition of max-max)} \\
&\leq d(v^{**}(\text{top}(v)), o) + d(o, \text{top}(v)) && \text{(Triangle Inequality)} \\
&\leq d(v^{**}(\text{top}(v)), o) + d(v, o) + d(v, \text{top}(v)) && \text{(Triangle Inequality)} \\
&\leq d(v^{**}(o), o) + d(v, o) + d(v, \text{top}(v)) && \text{(Observation A.8)} \\
&\leq d(v^{**}(o), o) + d(v, o) + d(v, o) && \text{(Observation A.7)} \\
&= d(v^{**}(o), o) + 2d(v, o) \\
&\leq 3d(v^{**}(o), o) && \text{(Observation A.8)} \\
&= 3\text{cost}(o) && (\text{cost}(o) = d(v^{**}(o), o)).
\end{aligned}$$

875 Combining this with Observation A.5, we have

$$\begin{aligned}
\mathbb{E}[\text{cost}(\mathbf{w})] &= \frac{1}{k} \sum_{g \in \mathcal{G}} \frac{1}{n_g} \sum_{v \in g} \text{cost}(\text{top}(v)) \\
&\leq 3\text{cost}(o).
\end{aligned}$$

876

□

877 **Theorem 4.2.** For the avg-max objective in general metric spaces,  $D((f_{rd}, f_{ur})) \leq 3$ .

*Proof.* Consider an instance  $\mathcal{I} = (\mathcal{V}, \mathcal{C}, \mathcal{G}, \pi, \mathbf{d})$  and rand-rand mechanism  $\Psi = (f_{rd}, f_{ur})$ . By definition of avg-max for any voter  $v \in \mathcal{V}$ , we have

$$\text{cost}(\text{top}(v)) = \frac{1}{k} \sum_{g \in \mathcal{G}} \text{cost}_g(\text{top}(v)).$$

878 Now, for any voter  $v \in g'$ , and any group  $g \in \mathcal{G}$  we have

$$\begin{aligned}
\text{cost}_g(\text{top}(v)) &= d(v^*(\text{top}(v), g), \text{top}(v)) && \text{(Definition of cost}_g(\cdot)) \\
&\leq d(v^*(\text{top}(v), g), v) + d(v, \text{top}(v)) && \text{(Triangle Inequality)} \\
&\leq d(v^*(\text{top}(v), g), v) + d(v, o) && \text{(Observation A.7)} \\
&\leq d(v^*(\text{top}(v), g), o) + d(v, o) + d(v, o) && \text{(Triangle Inequality)} \\
&\leq d(v^*(o, g), o) + 2d(v, o) && \text{(Observation A.9)} \\
&= \text{cost}_g(o) + 2d(v, o) && \text{(Definition of cost}_g(\cdot)) \\
&\leq \text{cost}_g(o) + 2d(v^*(o, g'), o) && \text{(Observation A.9)} \\
&= \text{cost}_g(o) + 2\text{cost}_{g'}(o) && \text{(Definition of cost}_g(\cdot)).
\end{aligned}$$



| Voter      | Preference Profile                    |
|------------|---------------------------------------|
| $v_{2i-1}$ | $\sigma \uparrow c_i \uparrow c_{2k}$ |
| $v_{2i}$   | $\sigma \uparrow c_{2k} \uparrow c_i$ |

Table 4: Preference profiles of voters  $v_{2i-1}$  and  $v_{2i}$  for any  $1 \leq i \leq k$  in Theorem 3.6.

879 Combining this with Observation A.5, we obtain

$$\begin{aligned}
\mathbb{E}[\text{cost}(\mathbf{w})] &= \frac{1}{k} \sum_{g \in \mathcal{G}} \frac{1}{n_g} \sum_{v \in g} \frac{1}{k} \sum_{g' \in \mathcal{G}} \text{cost}_{g'}(\text{top}(v)) \\
&\leq \frac{1}{k} \sum_{g \in \mathcal{G}} \frac{1}{n_g} \sum_{v \in g} \frac{1}{k} \sum_{g' \in \mathcal{G}} (2\text{cost}_g(\mathbf{o}) + \text{cost}_{g'}(\mathbf{o})) \\
&= \frac{1}{k} \sum_{g \in \mathcal{G}} \left( 2\text{cost}_g(\mathbf{o}) + \frac{1}{k} \sum_{g' \in \mathcal{G}} \text{cost}_{g'}(\mathbf{o}) \right) \\
&= \frac{1}{k} \sum_{g \in \mathcal{G}} 2\text{cost}_g(\mathbf{o}) + \text{cost}(\mathbf{o}) \quad (\text{Definition of } \text{cost}(\cdot)) \\
&= 3\text{cost}(\mathbf{o}) \quad (\text{Definition of } \text{cost}(\cdot)).
\end{aligned}$$

880

□

881 **Theorem 4.3.** *For the max-avg objective in general metric spaces,  $D((f_{rd}, f_{ur})) \leq 3$ .*

882 *Proof.* Consider an instance  $\mathcal{I} = (\mathcal{V}, \mathcal{C}, \mathcal{G}, \pi, \mathbf{d})$  and rand-rand mechanism  $\Psi = (f_{rd}, f_{ur})$ . By the  
883 definition of the max-avg objective, for any voter  $v \in \mathcal{V}$ , we have

$$\begin{aligned}
\text{cost}(\text{top}(v)) &= \max_{g \in \mathcal{G}} \text{cost}_g(\text{top}(v)) \\
&= \text{cost}_{g^*(\text{top}(v))}(\text{top}(v)) \\
&= \frac{1}{n_{g^*(\text{top}(v))}} \sum_{v' \in g^*(\text{top}(v))} \mathbf{d}(v', \text{top}(v)) \quad (\text{Definition of } \text{cost}_g(\cdot)).
\end{aligned}$$

884 Therefore we have

$$\begin{aligned}
\text{cost}_{g^*(\text{top}(v))}(\text{top}(v)) &= \frac{1}{n_{g^*(\text{top}(v))}} \sum_{v' \in g^*(\text{top}(v))} \mathbf{d}(v', \text{top}(v)) \\
&\leq \frac{1}{n_{g^*(\text{top}(v))}} \sum_{v' \in g^*(\text{top}(v))} \left( \mathbf{d}(v, \text{top}(v)) + \mathbf{d}(v, v') \right) \quad (\text{Triangle Inequality}) \\
&\leq \frac{1}{n_{g^*(\text{top}(v))}} \sum_{v' \in g^*(\text{top}(v))} \left( \mathbf{d}(v, \mathbf{o}) + \mathbf{d}(v, v') \right) \quad (\text{Observation A.7}) \\
&\leq \frac{1}{n_{g^*(\text{top}(v))}} \sum_{v' \in g^*(\text{top}(v))} \left( \mathbf{d}(v, \mathbf{o}) + \mathbf{d}(v, \mathbf{o}) + \mathbf{d}(\mathbf{o}, v') \right) \quad (\text{Triangle Inequality}) \\
&= 2\mathbf{d}(v, \mathbf{o}) + \frac{1}{n_{g^*(\text{top}(v))}} \sum_{v' \in g^*(\text{top}(v))} \mathbf{d}(\mathbf{o}, v') \\
&= 2\mathbf{d}(v, \mathbf{o}) + \text{cost}_{g^*(\text{top}(v))}(\mathbf{o}) \\
&\leq 2\mathbf{d}(v, \mathbf{o}) + \text{cost}(\mathbf{o}) \quad (\text{Observation A.6}).
\end{aligned}$$

885 Combining this with Observation A.5, we obtain

$$\begin{aligned}
\mathbb{E}[\text{cost}(\mathbf{w})] &= \frac{1}{k} \sum_{g \in \mathcal{G}} \frac{1}{n_g} \sum_{v \in g} \text{cost}(\text{top}(v)) \\
&= \frac{1}{k} \sum_{g \in \mathcal{G}} \frac{1}{n_g} \sum_{v \in g} \text{cost}_{g^*(\text{top}(v))}(\text{top}(v)) && (\text{Definition of } \text{cost}(\cdot)) \\
&\leq \frac{1}{k} \sum_{g \in \mathcal{G}} \frac{1}{n_g} \sum_{v \in g} (2d(v, \mathbf{o}) + \text{cost}(\mathbf{o})) \\
&= \text{cost}(\mathbf{o}) + \frac{1}{k} \sum_{g \in \mathcal{G}} \frac{1}{n_g} \sum_{v \in g} 2d(v, \mathbf{o}) \\
&= \text{cost}(\mathbf{o}) + \frac{2}{k} \sum_{g \in \mathcal{G}} \text{cost}_g(\mathbf{o}) && (\text{Definition of } \text{cost}_g(\cdot)) \\
&\leq \text{cost}(\mathbf{o}) + \frac{2}{k} \sum_{g \in \mathcal{G}} \text{cost}(\mathbf{o}) && (\text{Observation A.6}) \\
&= 3\text{cost}(\mathbf{o}).
\end{aligned}$$

886

□

887 **Theorem 4.4.** For the avg-avg objective in general metric spaces,  $D((f_{rd}, f_{ur})) \leq 3 - 2/kn^*$  where  
888  $n^*$  represents the maximum value of  $n_g$  over all groups.

*Proof.* Consider an instance  $\mathcal{I} = (\mathcal{V}, \mathcal{C}, \mathcal{G}, \pi, \mathbf{d})$  and rand-rand mechanism  $\Psi = (f_{rd}, f_{ur})$ . By the definition of the avg-avg objective, for any voter  $v \in \mathcal{V}$ , we have

$$\text{cost}(\text{top}(v)) = \frac{1}{k} \sum_{g' \in \mathcal{G}} \text{cost}_{g'}(\text{top}(v)).$$

889 For any voter  $v \in \mathcal{V}$  and group  $g'$ , we have

$$\begin{aligned}
\text{cost}_{g'}(\text{top}(v)) &= \frac{1}{n_{g'}} \sum_{v' \in g'} d(v', \text{top}(v)) && (\text{Definition of } \text{cost}_{g'}(\cdot)) \\
&\leq \frac{1}{n_{g'}} \sum_{v' \in g'} \left( d(v, \text{top}(v)) + d(v', v) \right) && (\text{Triangle Inequality}) \\
&\leq \frac{1}{n_{g'}} \sum_{v' \in g'} \left( d(v, \mathbf{o}) + d(v', v) \right) && (\text{Observation A.7}) \\
&= d(v, \mathbf{o}) + \frac{1}{n_{g'}} \sum_{v' \in g'} d(v', v).
\end{aligned}$$

890 Combining this with Observation A.5, we obtain

$$\begin{aligned}
\mathbb{E}[\text{cost}(\mathbf{w})] &= \frac{1}{k} \sum_{g \in \mathcal{G}} \frac{1}{n_g} \sum_{v \in g} \frac{1}{k} \sum_{g' \in \mathcal{G}} \text{cost}_{g'}(\text{top}(v)) && (\text{Definition of } \text{cost}(\cdot)) \\
&\leq \frac{1}{k} \sum_{g \in \mathcal{G}} \frac{1}{n_g} \sum_{v \in g} \frac{1}{k} \sum_{g' \in \mathcal{G}} \left( d(v, \mathbf{o}) + \frac{1}{n_{g'}} \sum_{v' \in g'} d(v', v) \right) \\
&= \frac{1}{k} \sum_{g \in \mathcal{G}} \frac{1}{n_g} \sum_{v \in g} d(v, \mathbf{o}) + \frac{1}{k} \sum_{g \in \mathcal{G}} \frac{1}{n_g} \sum_{v \in g} \frac{1}{k} \sum_{g' \in \mathcal{G}} \frac{1}{n_{g'}} \sum_{v' \in g'} d(v', v) \\
&= \text{cost}(\mathbf{o}) + \frac{1}{k} \sum_{g \in \mathcal{G}} \frac{1}{n_g} \sum_{v \in g} \frac{1}{k} \sum_{g' \in \mathcal{G}} \frac{1}{n_{g'}} \sum_{v' \in g'} d(v', v) && (\text{Definition of avg-avg})
\end{aligned}$$

891

$$\begin{aligned}
&\leq \text{cost}(\mathbf{o}) + \frac{1}{k} \sum_{g \in \mathcal{G}} \frac{1}{n_g} \sum_{v \in g} \frac{1}{k} \sum_{g' \in \mathcal{G}} \frac{1}{n_{g'}} \sum_{v' \in g', v' \neq v} \left( d(v, \mathbf{o}) + d(\mathbf{o}, v') \right) \quad (\text{Triangle Inequality}) \\
&= \text{cost}(\mathbf{o}) + \frac{1}{k} \sum_{g \in \mathcal{G}} \frac{1}{n_g} \sum_{v \in g} \frac{1}{k} \sum_{g' \in \mathcal{G}} \frac{1}{n_{g'}} \sum_{v' \in g'} \left( d(v, \mathbf{o}) + d(\mathbf{o}, v') \right) \\
&\quad - \frac{1}{k} \sum_{g \in \mathcal{G}} \frac{1}{n_g} \sum_{v \in g} \frac{1}{k} \sum_{g' \in \mathcal{G}, g'=g} \frac{1}{n_{g'}} \sum_{v' \in g', v'=v} \left( d(v, \mathbf{o}) + d(\mathbf{o}, v') \right) \\
&= \text{cost}(\mathbf{o}) + \frac{1}{k} \sum_{g \in \mathcal{G}} \frac{1}{n_g} \sum_{v \in g} \frac{1}{k} \sum_{g' \in \mathcal{G}} \frac{1}{n_{g'}} \sum_{v' \in g'} \left( d(v, \mathbf{o}) + d(\mathbf{o}, v') \right) \\
&\quad - \frac{1}{k} \sum_{g \in \mathcal{G}} \frac{1}{n_g} \sum_{v \in g} \frac{1}{k} \cdot \frac{1}{n_g} \cdot 2d(v, \mathbf{o}) \\
&= \text{cost}(\mathbf{o}) + 2\text{cost}(\mathbf{o}) - \frac{1}{k} \sum_{g \in \mathcal{G}} \frac{1}{n_g} \sum_{v \in g} \frac{1}{k} \cdot \frac{1}{n_g} \cdot 2d(v, \mathbf{o}) \quad (\text{Definition of avg-avg}) \\
&= 3\text{cost}(\mathbf{o}) - \frac{1}{k} \sum_{g \in \mathcal{G}} \frac{1}{n_g} \sum_{v \in g} \frac{1}{k} \cdot \frac{1}{n_g} \cdot 2d(v, \mathbf{o}) \\
&= 3\text{cost}(\mathbf{o}) - \frac{2}{k^2} \sum_{g \in \mathcal{G}} \frac{1}{n_g} \cdot \text{cost}_g(\mathbf{o}) \quad (\text{Definition of cost}_g(\cdot)) \\
&\leq 3\text{cost}(\mathbf{o}) - \frac{2}{k^2} \sum_{g \in \mathcal{G}} \frac{1}{n^*} \cdot \text{cost}_g(\mathbf{o}) \\
&= \left(3 - \frac{2}{kn^*}\right) \text{cost}(\mathbf{o}) \quad (\text{Definition of avg-avg}).
\end{aligned}$$

892

□

893 **Theorem 4.5.** *In the metric setting, any rand-rand mechanism has distortion of at least 3 for the*  
894 *max-avg and max-max objectives, even when the metric space is a line.*

895 *Proof.* We provide a proof for the max-avg objective. A similar argument can be used to prove the  
896 result for the max-max objective as well.

897 Consider any rand-rand mechanism  $\Psi$ . We construct an instance with candidates  $\mathcal{C} = \{c_1, c_2, c_3\}$   
898 and voters  $\mathcal{V} = \{v_1, v_2\}$ , where each voter belongs to a distinct group:  $v_1 \in g_1$  and  $v_2 \in g_2$ . The  
899 instance is constructed as follows, similarly to the configuration in Figure 6:

- 900 • Place candidates  $c_1, c_2$ , and  $c_3$  at coordinates  $-1, 0$ , and  $1$ , respectively.
- 901 • Place voter  $v_1$  at coordinate  $-\frac{1}{2}$  and voter  $v_2$  at coordinate  $\frac{1}{2}$ .
- 902 • Let the preference profiles be  $\pi_1 = (c_1, c_2, c_3)$  and  $\pi_2 = (c_3, c_2, c_1)$ .

903 One can verify that the preference profiles are consistent with the distances. Candidates  $c_1$  and  $c_3$   
904 are selected as representatives of  $g_1$  and  $g_2$ , and mechanism  $\Psi$  must select one of them as the final  
905 winner.

906 By the definitions of the max-avg objective and given that each group consists of a single voter we  
907 have:

$$\text{cost}(c_1) = \text{cost}(c_3) = \frac{3}{2}, \quad \text{and} \quad \text{cost}(c_2) = \frac{1}{2}.$$

908 Therefore, the distortion of  $\Psi$  is at least

$$\begin{aligned}
D(\Psi) &\geq \frac{\min(\text{cost}(c_1), \text{cost}(c_3))}{\text{cost}(c_2)} \\
&= 3.
\end{aligned}$$

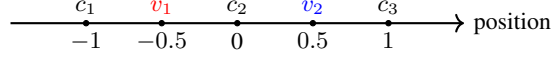

Figure 6: An instance used to prove Theorem 4.5.

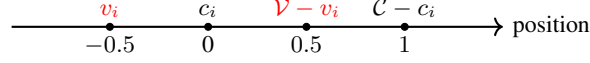

Figure 7: Configuration of candidates and voters in instance  $\mathcal{I}_i$  used in the proofs of Theorems 4.6 and 4.7.

909

□

910 **Theorem 4.6.** *In the metric setting, any rand-rand mechanism has distortion of at least  $3 - \frac{2}{n}$  for the*  
 911 *avg-max objective, even when the metric space is a line.*

912 *Proof.* Suppose there are  $m$  candidates,  $\mathcal{C} = \{c_1, c_2, \dots, c_m\}$ , and  $n = m$  voters,  $\mathcal{V} =$   
 913  $\{v_1, v_2, \dots, v_n\}$ . Each voter  $v_i$  has preference

$$\pi_i = (c_i, c_{i+1}, \dots, c_m, c_1, c_2, \dots, c_{i-1}).$$

914 We construct  $m$  instances,  $\mathcal{I}_1, \mathcal{I}_2, \dots, \mathcal{I}_m$  on the line metric, each containing a single group. Across  
 915 all instances, the sets  $\mathcal{V}, \mathcal{C}$ , and the preference profiles are the same; only the underlying metric space  
 916 differs.

917 Now consider any rand-rand mechanism  $\Psi$ . Let  $p_i$  be the probability that  $\Psi$  selects  $c_i$  as the winner.

918 For each  $1 \leq i \leq m$ , construction of instance  $\mathcal{I}_i$  is as follows (similar to Figure 7):

- 919 • Candidate  $c_i$  is located at 0, while all other candidates are located at 1.
- 920 • Voter  $v_i$  is located at  $-0.5$ , and all other voters are located at  $0.5$ .

921 It is straightforward to verify that the constructed instances are consistent with the specified preference  
 922 profiles.

923 For any instance  $\mathcal{I}_i$  we have:

$$\left( \sum_{1 \leq j \leq m, j \neq i, j \in \mathbb{N}} 3p_j \right) + p_i = 3 - 2p_i.$$

924 We know that the total probability must sum up to 1:

$$\sum_{1 \leq i \leq m, i \in \mathbb{N}} p_i = 1.$$

925 Hence, there exists some index  $i$  such that  $p_i \leq \frac{1}{m}$ . Substituting this into the distortion formula, we  
 926 get:

$$D(\Psi) \geq 3 - \frac{2}{m} = 3 - \frac{2}{n}.$$

927 Therefore, the distortion of any rand-rand mechanism is at least  $3 - \frac{2}{n}$  (equivalently,  $3 - \frac{2}{m}$ ).

928

□

929 **Theorem 4.7.** *For the max objective in the centralized setting, the distortion of any randomized*  
 930 *voting rule is at least  $3 - \epsilon$ , for any constant  $\epsilon > 0$ , even when the metric is a line.*

931 *Proof.* The result directly follows from the proof of Theorem 4.6, as the same instance construction  
 932 and analysis apply in the centralized setting under the max objective. As the number of voters  $n$   
 933 increases, the distortion approaches 3. Therefore, for any constant  $\epsilon > 0$ , we can construct an instance  
 934 where the distortion of mechanism  $\Psi$  exceeds  $3 - \epsilon$ , provided that  $n > \frac{2}{\epsilon}$ . □

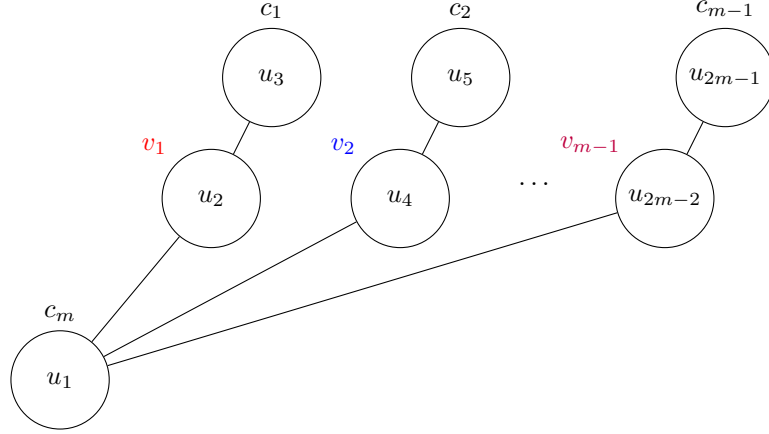

Figure 8: Tree graph used in the proof of Theorem 4.8. Different groups are distinguished with distinct colors.

| $d(\cdot, \cdot)$ | $c_i$ | $c_j$ | $c_m$ |
|-------------------|-------|-------|-------|
| $v_i$             | 1     | 3     | 1     |

Table 5: Pairwise distances between candidates and voters in Theorem 4.8 for all  $1 \leq i, j \leq k$  with  $i \neq j$ .

**Theorem 4.8.** Any rand-rand mechanism has metric distortion of at least  $3 - \frac{2}{n}$  for the avg-avg objective.

*Proof.* Consider any rand-rand mechanism  $\Psi$ , we construct an instance with  $k$  groups  $g_i = \{v_i\}$  for  $1 \leq i \leq k$ , candidates  $\mathcal{C} = \{c_1, c_2, \dots, c_{m=k+1}\}$ , and voters  $\mathcal{V} = \{v_1, v_2, \dots, v_{n=k}\}$ .

We now construct a connected graph  $G$  with  $n + m$  vertices  $u_1, u_2, \dots, u_{n+m}$  and then use the shortest-path distances in  $G$  as the underlying metric space  $\mathbf{d}$ . Each voter and candidate is placed on one of the vertices (a vertex may host multiple entities). The construction of  $G$  is as follows:

- For each  $1 \leq i \leq k$ , add an edge between  $u_1$  and  $u_{2i}$ , another edge between  $u_{2i}$  and  $u_{2i+1}$ . This creates  $k$  branches extending from the central vertex  $u_1$ .
- For each  $1 \leq i \leq k$  place voter  $v_i$  at vertex  $u_{2i}$ , and candidate  $c_i$  at vertex  $u_{2i+1}$ .
- Place candidate  $c_m$  at vertex  $u_1$ .

See Figure 8 for a visual representation and Table 5 for the corresponding distances.

It is easy to see that the following holds for any  $1 \leq i \leq k$  and  $1 \leq j \leq k$ , s.t.  $i \neq j$ : For any  $1 \leq i \leq k$ , we have  $\text{top}(v_i) = c_i$ .

Therefore representative of group  $g_i$  is candidate  $c_i$ . Consequently  $c_m$  is not the representative of any group, and thus can not be the winner decided by mechanism  $\Psi$ . We calculate the distortion using these information:

$$\begin{aligned} \text{cost}(c_i) &= \frac{(n-1) \cdot 3 + 1 \cdot 1}{n} = 3 - \frac{2}{n} & (1 \leq i < m), \\ \text{cost}(c_m) &= 1. \end{aligned}$$

952 Hence we have

$$\begin{aligned} D(\Psi) &\geq \min_{1 \leq i < m} \left( \frac{\text{cost}(c_i)}{\text{cost}(\mathbf{o})} \right) \\ &\geq \frac{\text{cost}(c_1)}{\text{cost}(c_m)} = 3 - \frac{2}{n}. \end{aligned}$$

953

□

## 954 D Proofs for Section 5 (Distortion Bounds of det-det)

955 **Theorem 5.1.** *Let  $\mathbf{f}_\beta$  be a deterministic voting rule with distortion at most  $\beta$ , and  $\mathbf{f}_{un}$  be an unanimous*  
 956 *deterministic rule. For the avg-max objective in general metric spaces,  $D((\mathbf{f}_{un}, \mathbf{f}_\beta)) \leq 2\beta + 3$ .*

957 *Proof.* Consider an arbitrary instance  $\mathcal{I} = (\mathcal{V}, \mathcal{C}, \mathcal{G}, \pi, \mathbf{d})$  and mechanism  $\Psi = (\mathbf{f}_{un}, \mathbf{f}_\beta)$ . For each  
 958 group  $g$ , let  $v_g$  be a voter who prefers the representative  $w_g$  over the optimal candidate  $\mathbf{o}$ . By the  
 959 unanimity of  $\mathbf{f}_{un}$ , such a voter always exists. We now derive an upper bound on the distortion of  $\Psi$ .  
 960

$$\begin{aligned} \text{cost}(\mathbf{w}) &= \frac{1}{k} \sum_{g \in \mathcal{G}} \mathbf{d}(v^*(\mathbf{w}, g), \mathbf{w}) && \text{(Definition of avg-max)} \\ &\leq \frac{1}{k} \sum_{g \in \mathcal{G}} \mathbf{d}(v^*(\mathbf{w}, g), \mathbf{o}) + \mathbf{d}(\mathbf{o}, \mathbf{w}) && \text{(Triangle Inequality)} \\ &\leq \frac{1}{k} \sum_{g \in \mathcal{G}} \mathbf{d}(v^*(\mathbf{o}, g), \mathbf{o}) + \mathbf{d}(\mathbf{o}, \mathbf{w}) && \text{(Observation A.9)} \\ &= \text{cost}(\mathbf{o}) + \frac{1}{k} \sum_{g \in \mathcal{G}} \mathbf{d}(\mathbf{o}, \mathbf{w}) && \text{(Definition of avg-max)} \\ &\leq \text{cost}(\mathbf{o}) + \frac{1}{k} \sum_{g \in \mathcal{G}} \mathbf{d}(\mathbf{o}, \mathbf{w}_g) + \mathbf{d}(\mathbf{w}, \mathbf{w}_g) && \text{(Triangle Inequality)} \\ &\leq \text{cost}(\mathbf{o}) + \frac{\beta + 1}{k} \sum_{g \in \mathcal{G}} \mathbf{d}(\mathbf{o}, \mathbf{w}_g) && \text{Observation A.11} \\ &\leq \text{cost}(\mathbf{o}) + \frac{\beta + 1}{k} \sum_{g \in \mathcal{G}} \mathbf{d}(\mathbf{o}, v_g) + \mathbf{d}(v_g, \mathbf{w}_g) && \text{(Triangle Inequality)} \\ &\leq \text{cost}(\mathbf{o}) + \frac{2\beta + 2}{k} \sum_{g \in \mathcal{G}} \mathbf{d}(\mathbf{o}, v_g) && (\mathbf{d}(v_g, \mathbf{w}_g) \leq \mathbf{d}(v_g, \mathbf{o})) \\ &\leq \text{cost}(\mathbf{o}) + \frac{2\beta + 2}{k} \sum_{g \in \mathcal{G}} \mathbf{d}(\mathbf{o}, v^*(\mathbf{o}, g)) && \text{(Observation A.9)} \\ &= (2\beta + 3) \cdot \text{cost}(\mathbf{o}) && \text{(Definition of avg-max).} \end{aligned}$$

961 This proves the desired upper bound of  $2\beta + 3$  for  $D(\Psi)$ .

□

962 **Theorem 5.2.** *For the max-max objective in general metric spaces,  $D(\mathbf{m}_{ad}) \leq 3$ .*

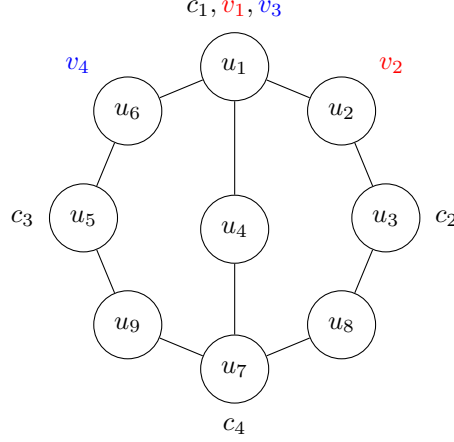

Figure 9: The figure illustrates the graph  $G$  in Theorem 5.3. Different groups are distinguished by different colors.

963 *Proof.* Suppose that the *Arbitrary Dictator* mechanism selects the top candidate of voter  $v$  as the  
 964 final winner. We follow a similar proof strategy as in Theorem 4.1.

$$\begin{aligned}
 \text{cost}(\mathbf{w}) &= d(v^{**}(\mathbf{w}), \mathbf{w}) && \text{(Definition of max-max)} \\
 &= d(v^{**}(\text{top}(v)), \text{top}(v)) && (\mathbf{w} = \text{top}(v)) \\
 &\leq d(v, v^{**}(\text{top}(v))) + d(v, \text{top}(v)) && \text{(Triangle Inequality)} \\
 &\leq d(v, v^{**}(\text{top}(v))) + d(v, \mathbf{o}) && \text{(Observation A.7)} \\
 &\leq d(v, \mathbf{o}) + d(\mathbf{o}, v^{**}(\text{top}(v))) + d(v, \mathbf{o}) && \text{(Triangle Inequality)} \\
 &\leq 3d(\mathbf{o}, v^{**}(\mathbf{o})) && \text{(Observation A.8)} \\
 &= 3 \cdot \text{cost}(\mathbf{o}) && \text{(Definition of max-max).}
 \end{aligned}$$

965 Therefore, the distortion of the *Arbitrary Dictator* mechanism is at most 3 for the max-max cost  
 966 objective in the metric setting.  $\square$

967 **Theorem 5.3.** Any *det-det* mechanism has metric distortion of at least 5 for the max-avg objective.

968 *Proof.* Consider any *det-det* mechanism  $\Psi = (f_{in}, f_{ov})$ , we construct an instance with 2 groups  
 969  $g_1 = \{v_1, v_2\}$  and  $g_2 = \{v_3, v_4\}$ , set of candidates  $\mathcal{C} = \{c_1, c_2, c_3, c_4\}$ , and set of voters  $\mathcal{V} =$   
 970  $\{v_1, v_2, v_3, v_4\}$ .

971 Let  $\sigma$  be an arbitrary ordering of the candidates. By Observation A.1, there exists a candidate with  
 972 in-degree at least  $\lceil \frac{m-1}{2} \rceil = 2$  in  $\mathcal{T}(f_{in}, \mathcal{C}, \sigma)$ . Without loss of generality, suppose  $c_1$  is such a  
 973 candidate. Also, suppose  $c_2$  and  $c_3$  are the two candidates that have directed edges toward  $c_1$  in the  
 974 tournament. Let  $c_4$  denote the remaining candidate in  $\mathcal{C}$ .

975 We now construct a connected graph  $G$  with 9 vertices  $u_1, u_2, \dots, u_9$ , and then use the shortest-path  
 976 distances in  $G$  as the underlying metric space  $\mathbf{d}$ . We position each voter and candidate at one of the  
 977 vertices (note that a single vertex may host multiple entities). Refer to Figure 9 for representation of  
 978 the graph.

979 We define the preference profiles in a way that is consistent with the distances shown in Table 7,  
 980 as well as  $\mathcal{T}(f_{in}, \mathcal{C}, \sigma)$ , represented in Table 6. Note that there may be other preference profiles  
 981 consistent with metric space  $\mathbf{d}$ .

982 Since both  $c_2$  and  $c_3$  defeat  $c_1$  in  $\mathcal{T}(f_{in}, \mathcal{C}, \sigma)$ , they must be the representatives of groups  $g_1$  and  $g_2$ ,  
 983 respectively. Thus, the set of representatives is  $\{c_2, c_3\}$ .

984 In *over-group* voting, let the preference profiles of the representatives  $c_2$  and  $c_3$  be  $(c_2, c_4, c_1, c_3)$  and  
 985  $(c_3, c_4, c_1, c_2)$ , respectively. One can verify that these preferences are consistent with the metric space.  
 986 The final winner cannot be  $c_1$  due to unanimity—both representatives prefer  $c_4$  over  $c_1$ . Therefore,  
 987 the final winner must be one of  $c_2, c_3$ , or  $c_4$ .

| Voter | Preference Profile                 |
|-------|------------------------------------|
| $v_1$ | $\sigma \uparrow c_2 \uparrow c_1$ |
| $v_2$ | $\sigma \uparrow c_1 \uparrow c_2$ |
| $v_3$ | $\sigma \uparrow c_3 \uparrow c_1$ |
| $v_4$ | $\sigma \uparrow c_1 \uparrow c_3$ |

Table 6: Preference profiles of voters in Theorem 5.3

| $d(\cdot, \cdot)$ | $c_1$ | $c_2$ | $c_3$ | $c_4$ |
|-------------------|-------|-------|-------|-------|
| $v_1$             | 0     | 2     | 2     | 2     |
| $v_2$             | 1     | 1     | 3     | 3     |
| $v_3$             | 0     | 2     | 2     | 2     |
| $v_4$             | 1     | 3     | 1     | 3     |

Table 7: Pairwise distances between the candidates and the voters derived from the graph  $G$  in Theorem 5.3.

988 We now calculate the distortion:

$$\begin{aligned}
D(\Psi) &\geq \min\left(\frac{\text{cost}(c_2), \text{cost}(c_3), \text{cost}(c_4)}{\text{cost}(c_1)}\right) \\
&\geq \frac{\frac{5}{2}}{\text{cost}(c_1)} \quad \left(\text{cost}(c_2) = \text{cost}(c_3) = \text{cost}(c_4) = \frac{5}{2}\right) \\
&= 5 \quad \left(\text{cost}(c_1) = \frac{1}{2}\right).
\end{aligned}$$

989

□

## 990 E Proofs for Section 6 (Distortion Lower Bounds in Euclidean Space)

991 **Theorem 6.1.** *Any rand-rand mechanism, with respect to the avg-avg cost function, has a distortion*  
992 *of at least  $\sqrt{5} - \epsilon$  for any constant  $\epsilon > 0$  in Euclidean space.*

993 *Proof.* Suppose  $l$  is an integer. Consider a scenario in  $(l+1)$ -dimensional space with  $l+2$  candidates,  
994  $c_1, c_2, \dots, c_{l+2}$ . There are  $k = l+1$  groups, each consisting of a single voter. We construct the  
995 instance as follows:

- 996 • Let  $q_i$  denote the point in  $\mathbb{R}^{l+1}$  whose  $i$ -th coordinate is 1 and all other coordinates are 0,  
997 for  $1 \leq i \leq l+1$ .
- 998 • Place candidate  $c_i$  at point  $q_i$  for each  $1 \leq i \leq l+1$ .
- 999 • Place candidate  $c_{l+2}$  at  $\left(\frac{1}{l+1}, \frac{1}{l+1}, \dots, \frac{1}{l+1}\right)$ .
- 1000 • There are  $l+1$  groups. In the  $i$ -th group, there is a single voter, denoted by  $v_i$ , located  
1001 at the point  $\left(\frac{1}{2(l+1)}, \frac{1}{2(l+1)}, \dots, \frac{1}{2(l+1)}, \frac{l+2}{2(l+1)}, \frac{1}{2(l+1)}, \dots, \frac{1}{2(l+1)}\right)$  where the  $i$ -th coordinate  
1002 is  $\frac{l+2}{2(l+1)}$  and all other coordinates are  $\frac{1}{2(l+1)}$ . This point lies at the midpoint between  
1003 candidates  $c_{l+2}$  and  $c_i$ . The top-ranked candidate for voter  $v_i$  is  $c_i$ .



1004 Let us now compute the distortion in this instance. Note that for all  $1 \leq i, j \leq l+1$  such that  $i \neq j$   
 1005 we have:

$$\begin{aligned} d(c_i, v_j) &= \sqrt{\left(\frac{1}{2(l+1)}\right)^2 (l-1) + \left(\frac{l+2}{2(l+1)}\right)^2 + \left(\frac{2l+1}{2l+2}\right)^2} \\ &= \sqrt{\frac{5l+4}{4l+4}}, \end{aligned}$$

1006 and for all  $1 \leq i \leq l+1$  we have:

$$\begin{aligned} d(c_i, v_i) &= d(c_{l+2}, v_i) \\ &= \sqrt{\left(\frac{1}{2(l+1)}\right)^2 l + \left(\frac{l}{2(l+1)}\right)^2} \\ &= \sqrt{\frac{l}{4(l+1)}}. \end{aligned}$$

1007 Therefore, we have:

$$\begin{aligned} \text{cost}(c_{l+2}) &= \frac{1}{2} \sqrt{\frac{l}{l+1}}, \\ \text{cost}(c_i) &= \frac{l \sqrt{\frac{5l+4}{4l+4}} + \frac{1}{2} \sqrt{\frac{l}{l+1}}}{l+1} \quad (1 \leq i \leq l+1). \end{aligned}$$

1008 We know that in group  $i$ , the representative is candidate  $c_i$ . Therefore, the final winner is one of the  
 1009 candidates  $c_1, c_2, \dots, c_{l+1}$ . To lower bound the distortion of any rand-rand mechanism  $\Psi$  under the  
 1010 avg-avg cost function, we can compare the cost of each  $c_i$ , for  $1 \leq i \leq l+1$ , with the cost of  $c_{l+2}$ .  
 1011 Specifically, the ratio  $\frac{\text{cost}(c_i)}{\text{cost}(c_{l+2})}$  provides a lower bound on the distortion:

$$\begin{aligned} D(\Psi) &\geq \frac{\text{cost}(c_i)}{\text{cost}(c_{l+2})} \\ &= \frac{l}{l+1} \sqrt{\frac{5l+4}{l}} + \frac{1}{l+1} \quad (1 \leq i \leq l+1), \end{aligned}$$

1012 and thus we have:

$$\lim_{l \rightarrow \infty} \frac{l}{l+1} \sqrt{\frac{5l+4}{l}} + \frac{1}{l+1} = \sqrt{5}.$$

1013 Therefore, for any real number  $\epsilon > 0$ , we can construct an instance whose distortion exceeds  $\sqrt{5} - \epsilon$ .  
 1014 When  $l = 2$  the instance lies within an equilateral triangle with vertices at  $(1, 0, 0)$ ,  $(0, 1, 0)$ , and  
 1015  $(0, 0, 1)$ . A diagram of this instance is shown in Figure 10.

1016 □

1017 **Theorem 6.2.** Any rand-det mechanism, with respect to the avg-avg cost function, has a distortion of  
 1018 at least  $2 + \sqrt{5} - \epsilon$  for any constant  $\epsilon > 0$  in Euclidean space.

1019 *Proof.* Consider any rand-det mechanism  $\Psi = (f_{in}, f_{ov})$ . let  $\mathcal{C} = \{c_1, c_2, \dots, c_{2m}\}$  be the set of  
 1020 candidates, and let  $\sigma$  be an arbitrary ordering over these candidates.

1021 By Observation A.1, we know that in  $\mathcal{T}(f_{in}, \mathcal{C}, \sigma)$ , there always exists a candidate with in-degree at  
 1022 least  $\lceil \frac{2m-1}{2} \rceil = m$ . Without loss of generality, assume that  $c_{m+1}$  is such a candidate.

1023 Without loss of generality, assume that  $c_1, c_2, \dots, c_m$  are  $m$  candidates that have directed edges  
 1024 toward  $c_{m+1}$  in the tournament.

1025 We now construct the following instance in  $(m+1)$ -dimensional Euclidean space:

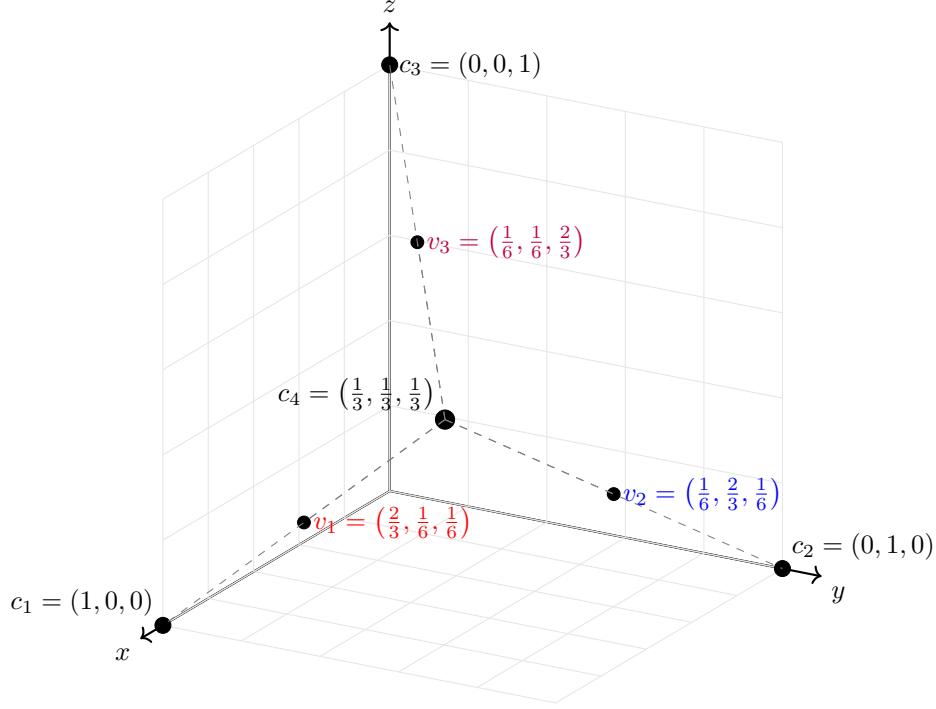

Figure 10: A 3-dimensional Euclidean instance illustrating the lower bound construction for rand-rand mechanisms under the avg-avg cost function when  $l = 2$ . Candidates  $c_1$ ,  $c_2$ , and  $c_3$  are placed at the unit basis vectors. The point  $c_4 = (\frac{1}{3}, \frac{1}{3}, \frac{1}{3})$  lies at the centroid of the triangle formed by these candidates. Voters  $v_1$ ,  $v_2$ , and  $v_3$  are each positioned at the midpoint between the centroid  $c_4$  and their top-ranked candidate  $c_i$ . Different groups are indicated using distinct colors.

- 1026 • Let  $q_i$  be the point in  $\mathbb{R}^{m+1}$  whose  $i$ -th coordinate is 1 and all other coordinates are 0, for  
1027  $1 \leq i \leq m+1$ .
- 1028 • Place candidate  $c_i$  at point  $q_i$  for each  $1 \leq i \leq m$ .
- 1029 • Place candidate  $c_i$  at point  $q_{m+1}$  for each  $m+2 \leq i \leq 2m$ .
- 1030 • Place candidate  $c_{m+1}$  at the point  $(\frac{1}{m+1}, \frac{1}{m+1}, \dots, \frac{1}{m+1})$ .
- 1031 • We have  $k = m$  groups. In the  $i$ -th group, there are two voters:  $v_{2i-1}$  and  $v_{2i}$ .
  - 1032 – Voter  $v_{2i-1}$  is located at the point  $(\frac{1}{m+1}, \frac{1}{m+1}, \dots, \frac{1}{m+1})$ , which coincides with the  
1033 position of candidate  $c_{m+1}$ .
  - 1034 – Voter  $v_{2i}$  is located at the point
 
$$\left( \frac{1}{2(m+1)}, \frac{1}{2(m+1)}, \dots, \frac{m+2}{2(m+1)}, \dots, \frac{1}{2(m+1)} \right),$$
 where the  $i$ -th coordinate is  $\frac{m+2}{2(m+1)}$  and all other coordinates are  $\frac{1}{2(m+1)}$ . This point  
1035 lies at the midpoint between candidates  $c_{m+1}$  and  $c_i$  ( $1 \leq i \leq m$ ).  
1036
- 1037 • The ordinal preferences of the  $v_{2i-1}$  and  $v_{2i}$  are as follows:
  - 1038 –  $\pi_{2i-1} = \sigma \uparrow c_i \uparrow c_{m+1}$
  - 1039 –  $\pi_{2i} = \sigma \uparrow c_{m+1} \uparrow c_i$
- 1040 These preferences are consistent with the distances:
  - 1041 – The distance from  $v_{2i-1}$  to all candidates except  $c_{m+2}$  is the same.

- 1042 – The distance from  $v_{2i-1}$  to  $c_{m+2}$  is zero.
- 1043 –  $v_{2i}$  is closer to  $c_{m+1}$  and  $c_i$  than to the other candidates, and equidistant from all
- 1044 remaining ones.
- 1045 –  $v_{2i}$  has equal distance to  $c_{m+1}$  and  $c_i$ .

1046 Now, let us calculate the distortion for this instance. Note that for all  $1 \leq i, j \leq m$  we have:

$$\begin{aligned} d(c_i, c_{m+1}) &= d(c_i, v_{2j-1}) \\ &= \sqrt{\left(\frac{1}{m+1}\right)^2 m + \left(\frac{m}{m+1}\right)^2} \\ &= \sqrt{\frac{m}{m+1}}, \end{aligned}$$

1047 and for all  $1 \leq i, j \leq m$  such that  $i \neq j$  we have:

$$\begin{aligned} d(c_i, v_{2j}) &= \sqrt{\left(\frac{1}{2(m+1)}\right)^2 (m-1) + \left(\frac{m+2}{2(m+1)}\right)^2 + \left(\frac{2m+1}{2m+2}\right)^2} \\ &= \sqrt{\frac{5m+4}{4m+4}}, \end{aligned}$$

1048 and for all  $1 \leq i \leq m$  we have:

$$\begin{aligned} d(c_i, v_{2i}) &= \sqrt{\left(\frac{1}{2(m+1)}\right)^2 m + \left(\frac{m}{2(m+1)}\right)^2} \\ &= \sqrt{\frac{m}{4(m+1)}}. \end{aligned}$$

1049 Therefore, we have:

$$\begin{aligned} \text{cost}(c_{m+1}) &= \frac{m \left( \frac{0 + \sqrt{\frac{m}{4(m+1)}}}{2} \right)}{m} \\ &= \frac{1}{4} \sqrt{\frac{m}{m+1}}, \\ \text{cost}(c_i) &= \frac{\frac{\sqrt{\frac{m}{m+1}} + \sqrt{\frac{5m+4}{4m+4}}}{2} (m-1) + \frac{\sqrt{\frac{m}{m+1}} + \sqrt{\frac{m}{4(m+1)}}}{2}}{m} \quad (\forall 1 \leq i \leq m). \end{aligned}$$

1050 By the definition of  $\mathcal{T}(f_{in}, \mathcal{C}, \sigma)$ , the representative of group  $i$  is candidate  $c_i$  ( $1 \leq i \leq m$ ). Therefore,  
 1051 the final winner is one of the candidates  $c_1, c_2, \dots, c_m$ . To obtain a lower bound on the distortion of  
 1052 this mechanism, we consider the ratio  $\frac{\text{cost}(c_i)}{\text{cost}(c_{m+1})}$  for any  $1 \leq i \leq m$ :

$$\begin{aligned} D(\Psi) &\geq \frac{\text{cost}(c_i)}{\text{cost}(c_{m+1})} \\ &= 2 + \frac{m-1}{m} \sqrt{\frac{5m+4}{m}} + \frac{1}{m} \quad (1 \leq i \leq m), \end{aligned}$$

1053 and we have:

$$\lim_{m \rightarrow \infty} 2 + \frac{m-1}{m} \sqrt{\frac{5m+4}{m}} + \frac{1}{m} = 2 + \sqrt{5}.$$

1054 Therefore, for any real number  $\epsilon > 0$ , we can construct an instance with a distortion greater than  
 1055  $2 + \sqrt{5} - \epsilon$ .

1056 When  $m = 2$  the instance lies within an equilateral triangle with vertices at  $(1, 0, 0)$ ,  $(0, 1, 0)$ , and  
 1057  $(0, 0, 1)$ . A diagram of this instance is shown in Figure 11.

1058 □

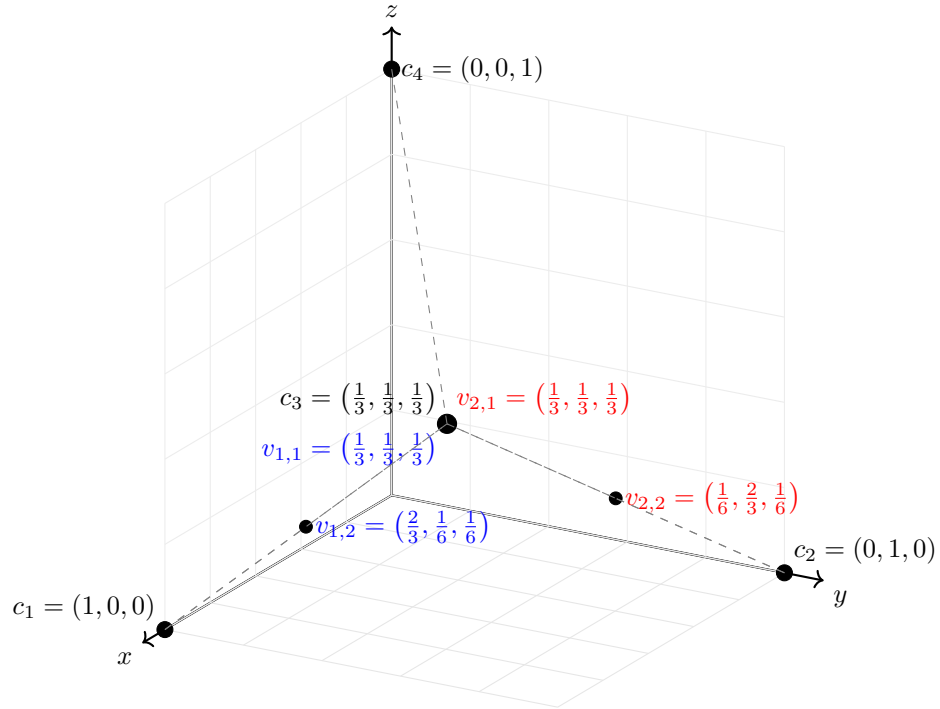

Figure 11: An illustration of the constructed instance when  $m = 2$ . The candidates are positioned at the corners and centroid of the 3D simplex (i.e., the equilateral triangle embedded in  $\mathbb{R}^3$ ). Candidate  $c_3$  is placed at the centroid, representing the candidate with high in-degree in  $\mathcal{T}(f_{in}, \mathcal{C}, \sigma)$ . Each group contains two voters:  $v_{2i-1}$  is located at the centroid, while  $v_{2i}$  is placed at the midpoint between  $c_3$  and  $c_i$  for  $i = 1, 2$ . Different groups are distinguished using different colors.
